# Supplementary material for: Off-target effects of protein tyrosine phosphatase inhibitors on oncostatin M-treated human epidermal keratinocytes: the phosphatase targeting STAT1 remains unknown
Source: PeerJ journal article supplement (doi:10.7717/peerj.9504), 2020-08-14

Supplementary Figure S3 - Replicate Western Blots of STAT1 – Original Images Figs 2-4

Figure 2A

|             |    |     |    |    |
|-------------|----|-----|----|----|
| OSM         | +  | +   | +  | -  |
| OSM (ng/ml) | 50 | 50  | 50 | 50 |
| Time (hr)   | 6  | 0.5 | 1  | 0  |

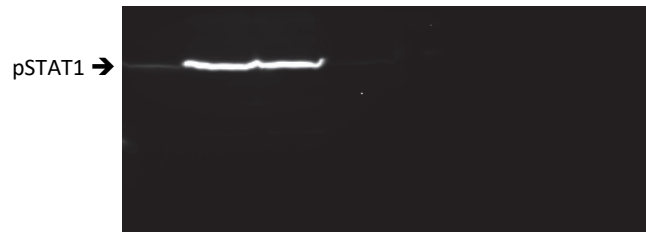

Replicate 2

Figure 2C

Replicate 2

|                     |    |    |     |   |    |   |
|---------------------|----|----|-----|---|----|---|
| OSM (50ng/ml)       | +  | +  | +   | + | -  | - |
| Vanadate ( $\mu$ M) | 10 | 30 | 100 | 0 | 30 | 0 |

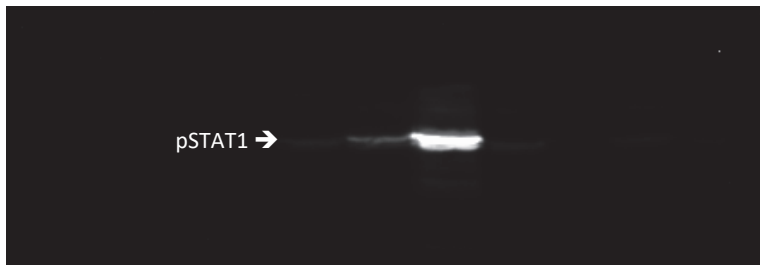

Replicate 3

|                     |    |    |     |   |    |   |
|---------------------|----|----|-----|---|----|---|
| OSM (50ng/ml)       | +  | +  | +   | + | -  | - |
| Vanadate ( $\mu$ M) | 10 | 30 | 100 | 0 | 30 | 0 |

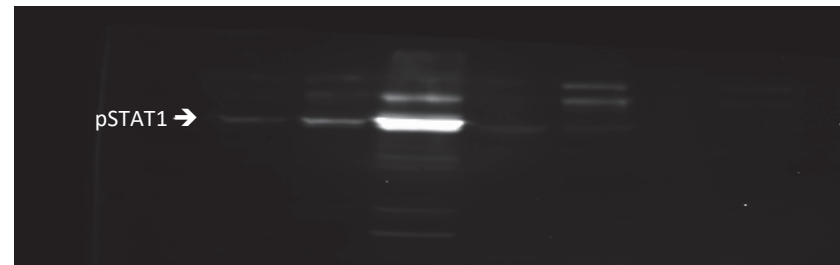

Figure 3A      Replicate 2

|     |            |            |            |            |                     |
|-----|------------|------------|------------|------------|---------------------|
|     | <u>NSC</u> | <u>JTT</u> | <u>NSC</u> | <u>JTT</u> | <u>No inhibitor</u> |
| OSM | +          | +          | -          | -          | +                   |

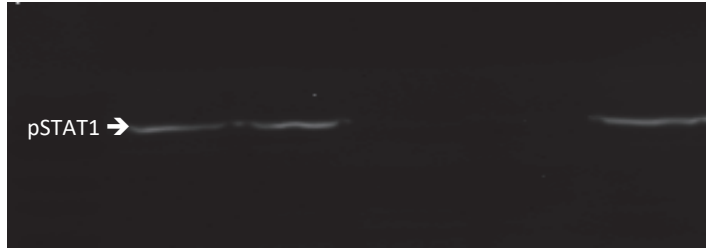

NSC-87877 and JTT-551 treated at 100  $\mu$ M

Figure 3B      Replicate 2 with inverted image

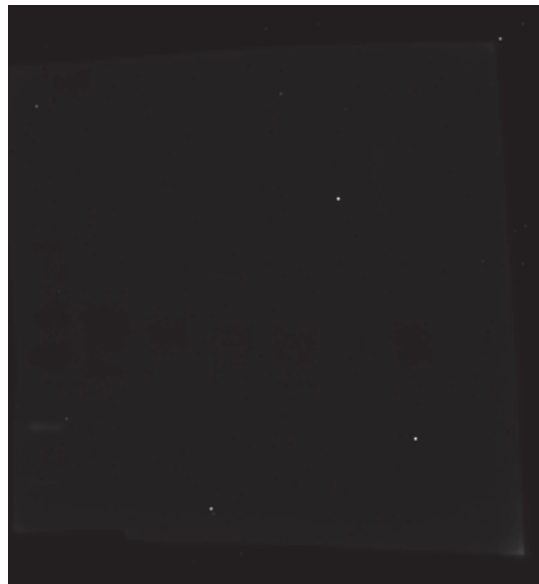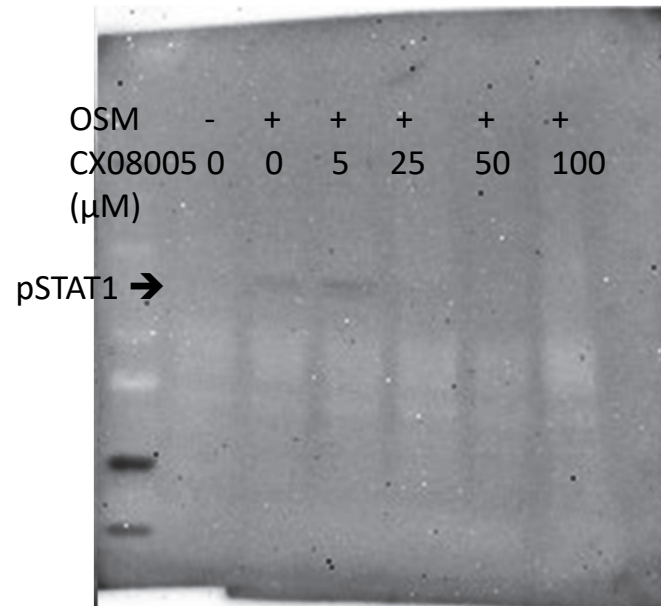

Figure 4A

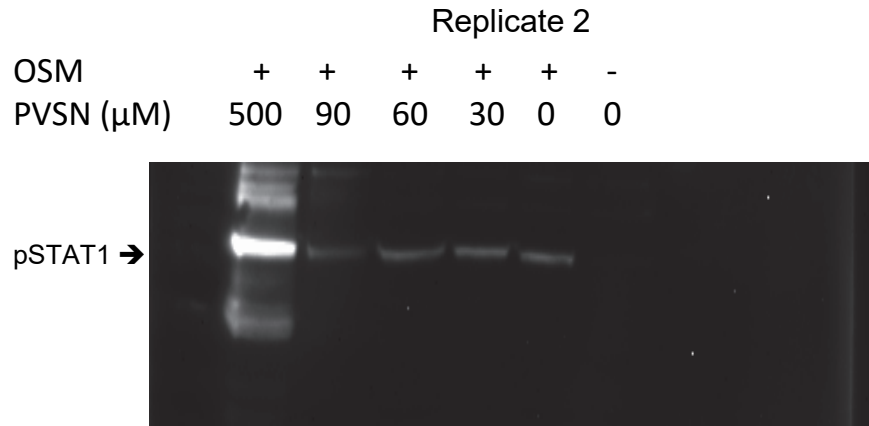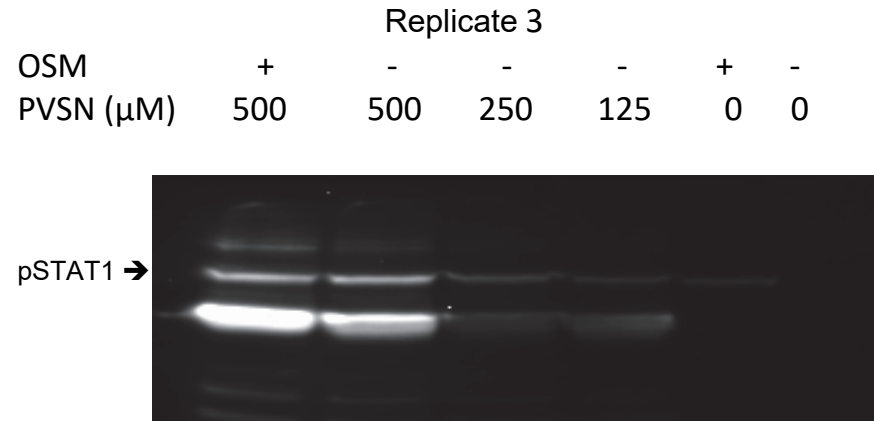

Figure 4B

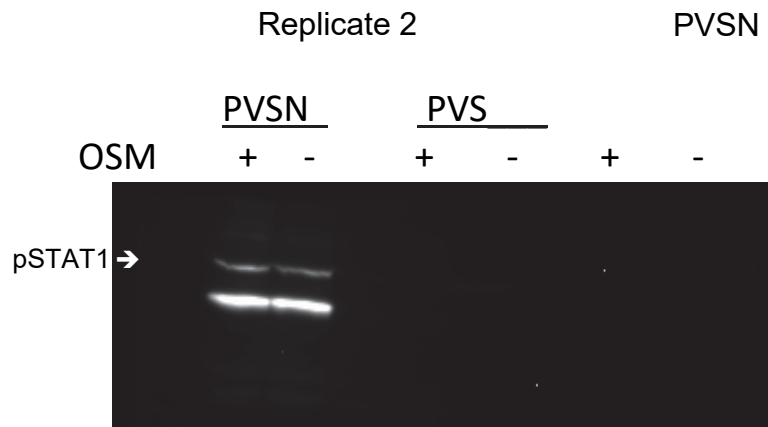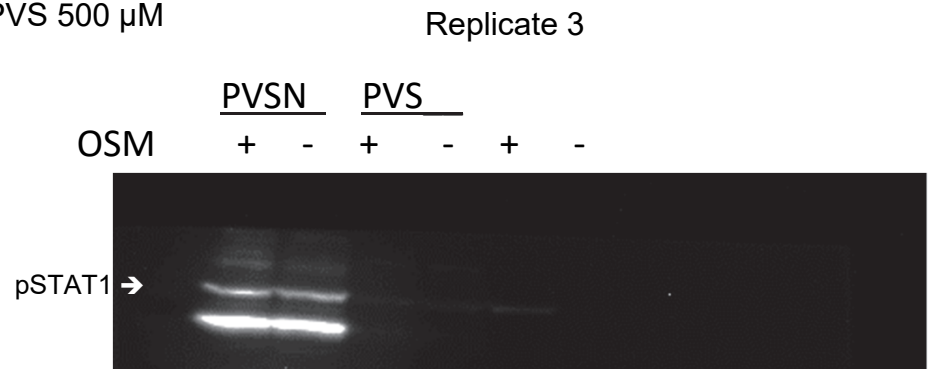

Supplement: Figure_S6.pdf [file Figure_S6.pdf]
