# Supplementary material for: Off-target effects of protein tyrosine phosphatase inhibitors on oncostatin M-treated human epidermal keratinocytes: the phosphatase targeting STAT1 remains unknown
Source: PeerJ. 2020 Aug 14;8:e9504. doi: 10.7717/peerj.9504 (PMC7430265; doi:10.7717/peerj.9504)
Supplement: Data S1 [file peerj-08-9504-s008.xlsx]

## Sheet: Sheet1
Sample	Density (Intensity/area)	Actin	Normalize	Normalize to control
PVSN + OsM	10341.7	15562.8	0.664512	0.899568
PVSN	10434.5	14649.6	0.712275	0.964225
PVN+ OsM	14213	17840.7	0.796662	1.07846
PVN	13188.6	18045.2	0.730864	0.98939
OsM	13492.8	20513.9	0.657738	0.890397
Control	14906.5	20179.3	0.738702	1
