# Supplementary material for: Off-target effects of protein tyrosine phosphatase inhibitors on oncostatin M-treated human epidermal keratinocytes: the phosphatase targeting STAT1 remains unknown
Source: PeerJ. 2020 Aug 14;8:e9504. doi: 10.7717/peerj.9504 (PMC7430265; doi:10.7717/peerj.9504)
Supplement: Data S2 [file peerj-08-9504-s009.xlsx]

## Sheet: A
Response	Cytokine	Marker
1	None	1K
1	None	1K
1	None	10K
1	None	10K
1	None	1DSC
1	None	1DSC
1	None	1DSG
1	None	1DSG
1	None	FLG
1	None	FLG
0.602393	4IL	1K
0.372533	4IL	1K
0.640476	4IL	10K
0.808443	4IL	10K
4.7325	4IL	1DSC
3.97004	4IL	1DSC
1.08986	4IL	1DSG
1.14687	4IL	1DSG
0.355748	4IL	FLG
0.213307	4IL	FLG
0.181788	6IL	1K
0.0761574	6IL	1K
0.198399	6IL	10K
0.183709	6IL	10K
0.135431	6IL	1DSC
0.0833203	6IL	1DSC
0.383853	6IL	1DSG
0.218497	6IL	1DSG
0.241858	6IL	FLG
0.120678	6IL	FLG
0.494667	20IL	1K
0.261105	20IL	1K
0.522263	20IL	10K
0.538471	20IL	10K
0.324466	20IL	1DSC
0.241202	20IL	1DSC
0.52493	20IL	1DSG
0.385147	20IL	1DSG
0.195273	20IL	FLG
0.303266	20IL	FLG
0.0134556	OSM	1K
0.013933	OSM	1K
0.00706679	OSM	10K
0.0133032	OSM	10K
0.0253653	OSM	1DSC
0.0300719	OSM	1DSC
0.0291722	OSM	1DSG
0.0582957	OSM	1DSG
0.0465186	OSM	FLG
0.0619879	OSM	FLG

## Sheet: B
Cytokine	CFE
None	2.53
None	1.8
None	2.54
None	2.12
IL4	2.93
IL4	2.13
IL4	2.75
IL4	2.54
IL6	3.85
IL6	3.57
IL6	3.58
IL6	3.46
IL20	3.01
IL20	2.94
IL20	3.22
IL20	2.88
OSM	5.36
OSM	3.56
OSM	4.18
OSM	3.44
