# Supplementary material for: Off-target effects of protein tyrosine phosphatase inhibitors on oncostatin M-treated human epidermal keratinocytes: the phosphatase targeting STAT1 remains unknown
Source: PeerJ journal article supplement (doi:10.7717/peerj.9504), 2020-08-14
Supplement: Figure_S1.pdf [file Figure_S1.pdf]

|          |     |    |    |   |     |   |
|----------|-----|----|----|---|-----|---|
| Vanadate | 100 | 60 | 30 | 0 | 100 | - |
| OSM      | +   | +  | +  | + | -   | - |

pSTAT1

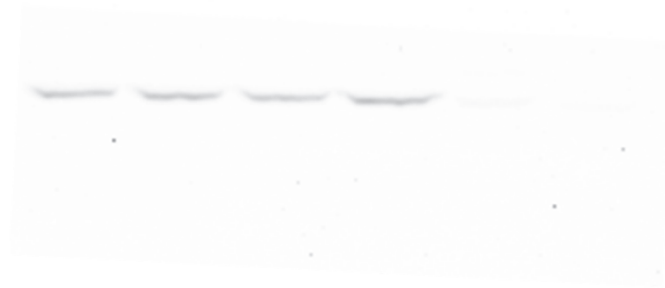

**Fig S1. Lack of vanadate action (0-100 μM) with 2 hr treatment and removal with subsequent OSM treatment for 6 hr. As seen, vanadate alone was ineffective.**
