# Supplementary material for: Off-target effects of protein tyrosine phosphatase inhibitors on oncostatin M-treated human epidermal keratinocytes: the phosphatase targeting STAT1 remains unknown
Source: PeerJ journal article supplement (doi:10.7717/peerj.9504), 2020-08-14
Supplement: Figure_S3.pdf [file Figure_S3.pdf]

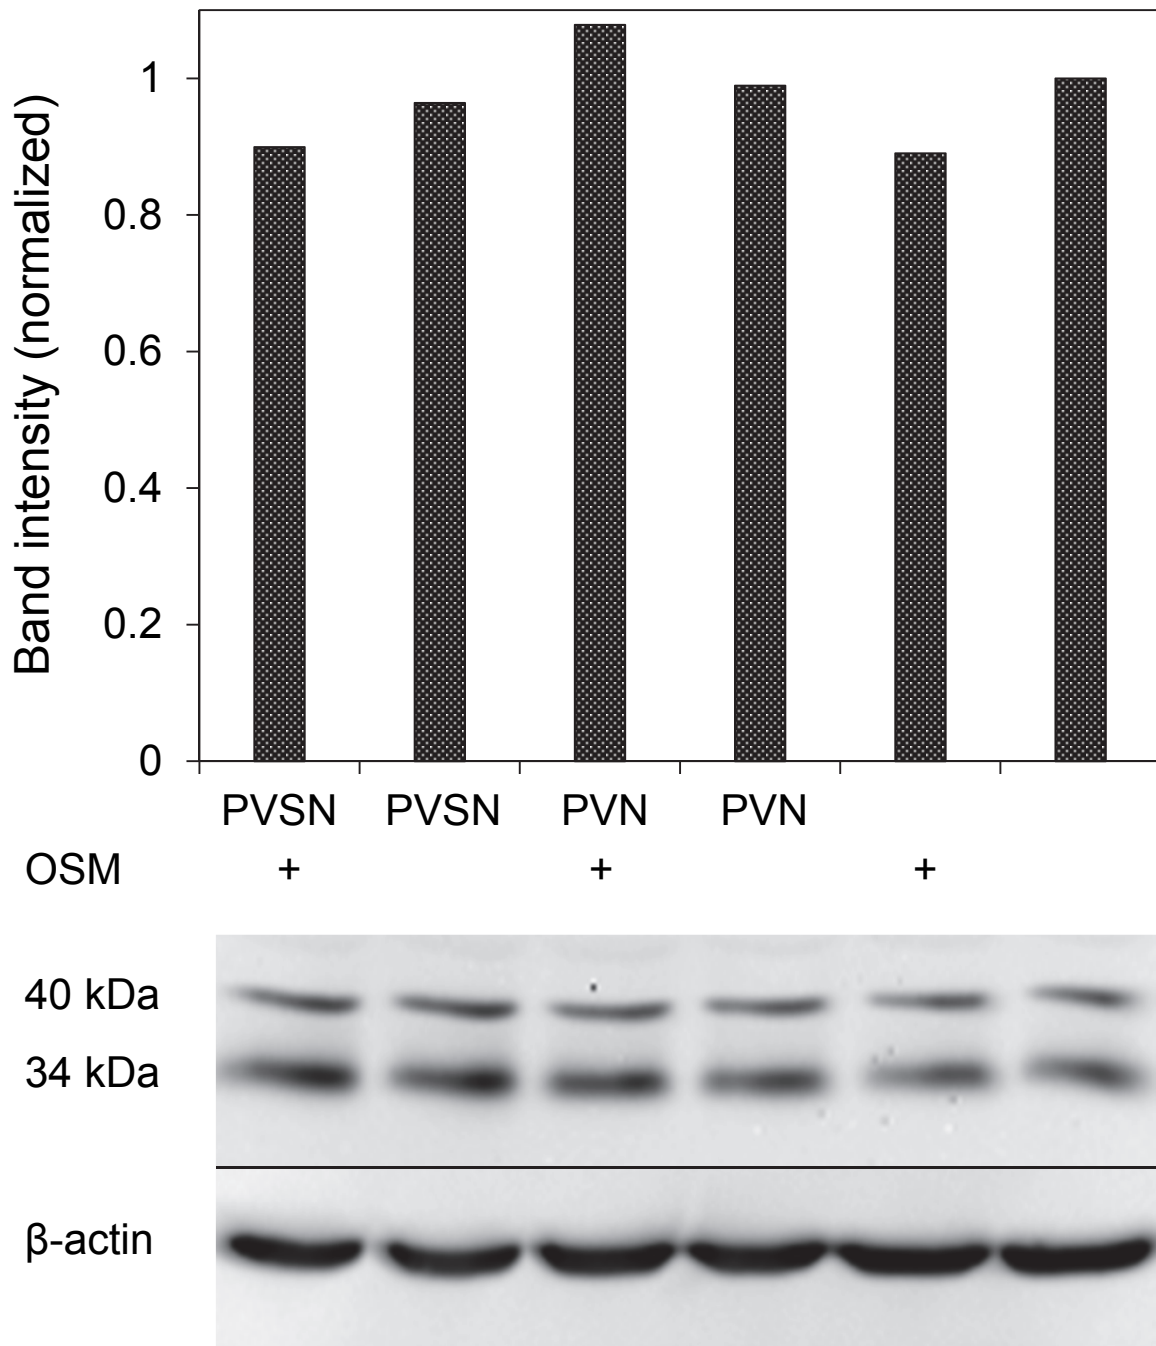

**Figure S3. Lack of caspase-3 activation detected by immunoblotting.** Cultures treated with PVS, PVSN and OSM as indicated were harvested and immunoblotted with anti-caspase-3 and anti- $\beta$ -actin as a loading control. For each lane in the lower panel, densities of the 40 and 34 kDa bands were quantitated, added and normalized to the density of the  $\beta$ -actin band. The values are shown in panel A.
