# Supplementary material for: Off-target effects of protein tyrosine phosphatase inhibitors on oncostatin M-treated human epidermal keratinocytes: the phosphatase targeting STAT1 remains unknown
Source: PeerJ journal article supplement (doi:10.7717/peerj.9504), 2020-08-14
Supplement: Figure_S4.pdf [file Figure_S4.pdf]

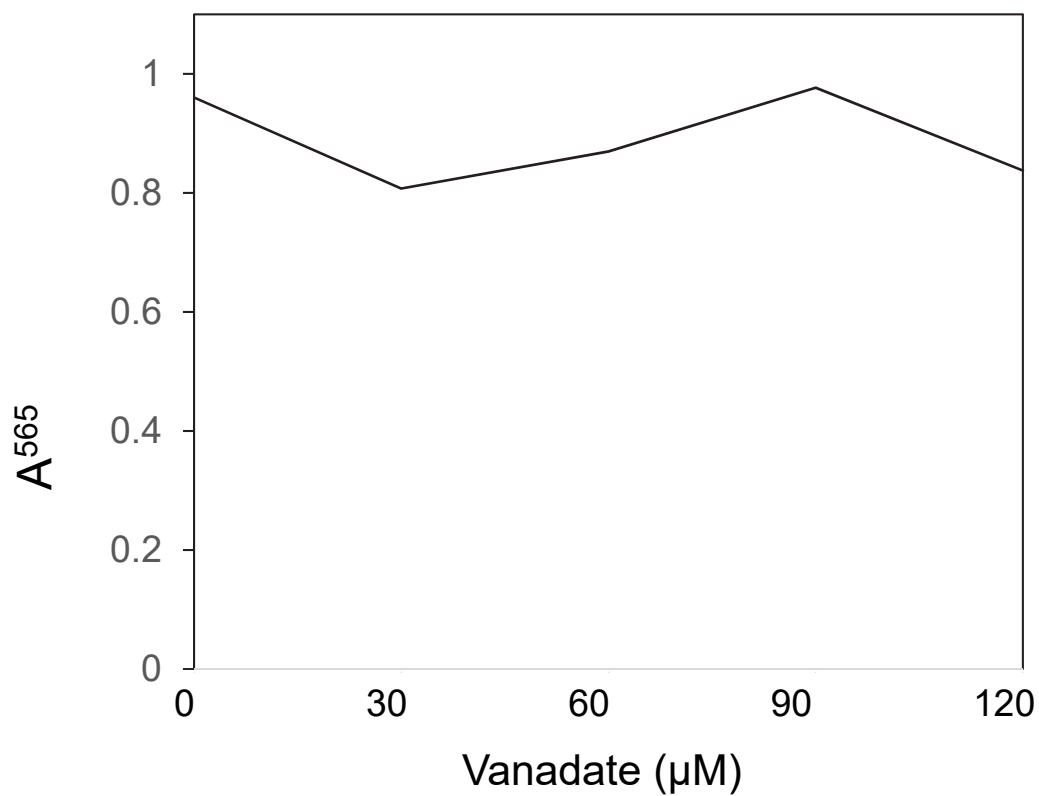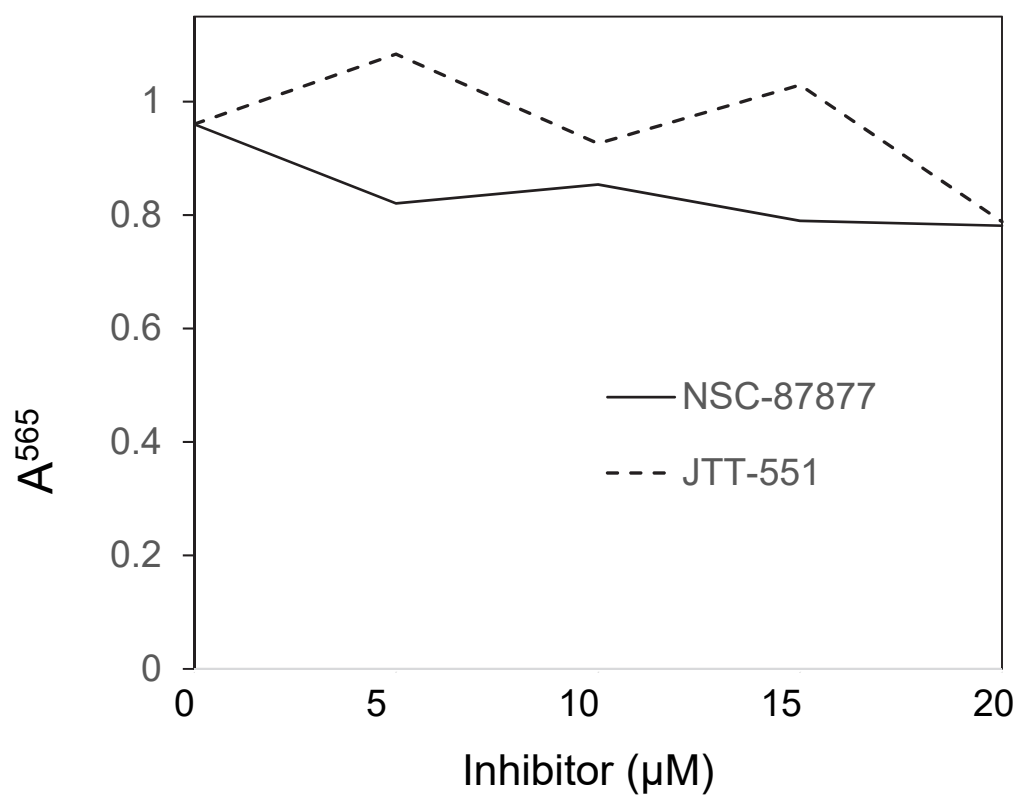

**Figure S4. Lack of effect of phosphatase inhibitors on ionophore-induced envelope formation.** Cultures were treated for 2 hr. Envelopes were induced by treatment with X537A (70  $\mu\text{M}$ ) and the envelope protein was quantitated with bicinchoninic acid ( $A^{565}$ ).
