# Supplementary material for: Off-target effects of protein tyrosine phosphatase inhibitors on oncostatin M-treated human epidermal keratinocytes: the phosphatase targeting STAT1 remains unknown
Source: PeerJ journal article supplement (doi:10.7717/peerj.9504), 2020-08-14
Supplement: TableS1.pdf [file TableS1.pdf]

**Table S1. Relative mRNA levels of protein tyrosine phosphatases in SIK.**

Normalized values were obtained from next generation sequencing (Phillips et al, 2016).

| <b>PTP<sup>1</sup></b> | <b>RPKM<sup>2</sup></b> | <b>Features<sup>3</sup></b> |
|------------------------|-------------------------|-----------------------------|
| PTP4A1                 | 11.9                    | prenylated                  |
| PTP4A2                 | 24.8                    | prenylated                  |
| PTPDC1                 | 1.4                     | centrosomal                 |
| PTPMT1                 | 8.2                     | mitochondrial               |
| PTPN1                  | 21.4                    | *PTP1B <sup>4</sup>         |
| PTPN11                 | 25.7                    | *SHP2 <sup>4</sup>          |
| PTPN12                 | 16.6                    | *PTPG1 <sup>4</sup>         |
| PTPN13                 | 24.4                    | *                           |
| PTPN14                 | 15.3                    | *                           |
| PTPN18                 | 4.4                     | *                           |
| PTPN2                  | 7.1                     | *TCPTP <sup>4</sup>         |
| PTPN21                 | 4.2                     | *                           |
| PTPN23                 | 11.6                    | *                           |
| PTPN3                  | 6.8                     | *                           |
| PTPN4                  | 1.8                     | *                           |
| PTPN6                  | 8.1                     | *SHP1 <sup>4</sup>          |
| PTPN9                  | 3.0                     | *                           |
| PTPRA                  | 15.0                    |                             |
| PTPRE                  | 1.8                     |                             |
| PTPRF                  | 82.7                    |                             |
| PTPRG                  | 1.1                     |                             |
| PTPRK                  | 6.3                     |                             |
| PTPRM                  | 4.1                     |                             |
| PTPRS                  | 3.0                     |                             |
| PTPRU                  | 12.4                    |                             |
| PTPRZ1                 | 3.4                     |                             |

<sup>1</sup>Protein tyrosine phosphatase gene name

<sup>2</sup>Reads per kb per million mapped reads; limited to RPKM>1

<sup>3</sup>Lipid modification, localization or (\*) non-receptor designation

<sup>4</sup>Alternate name
